# Supplementary material for: The unusual binding mechanism of Cu(ii) ions to the poly-histidyl domain of a peptide found in the venom of an African viper
Source: Royal Society of Chemistry journal article supplement (doi:10.1039/c4dt02257b), 2014-09-10
Supplement: c4dt02257b1.pdf [file c4dt02257b1.pdf]

## Electronic Supporting Information for

# Unusual binding mechanism of Cu(II) ions to the poly-histidyl domain of a peptide found in the venom of an african viper

Fabio Pontecchiani,<sup>a</sup> Eyal Simonovsky,<sup>bc</sup> Robert Wieczorek,<sup>d</sup> Nuno Barbosa,<sup>d</sup>  
Magdalena Rowinska-Zyrek,<sup>d</sup> Slawomir Potocki,<sup>d</sup> Maurizio Remelli,<sup>\*a</sup> Yifat  
Miller<sup>\*bc</sup> and Henryk Kozlowski<sup>\*d</sup>

<sup>a</sup> Department of Chemical and Pharmaceutical Sciences, University of Ferrara, via Fossato di Mortara 17, I-44121 Ferrara, Italy. E-mail: rmm@unife.it

<sup>b</sup> Department of Chemistry and <sup>c</sup>Ilse Katz Institute for Nanoscale Science and Technology, Ben Gurion University of the Negev, Beer-Sheva 84105, Israel. E-mail: ymiller@bgu.ac.il

<sup>d</sup> Department of Chemistry, University of Wrocław, F. Joliot-Curie 14, 50-383 Wrocław, Poland. E-mail: henryk.kozlowski@chem.uni.wroc.pl

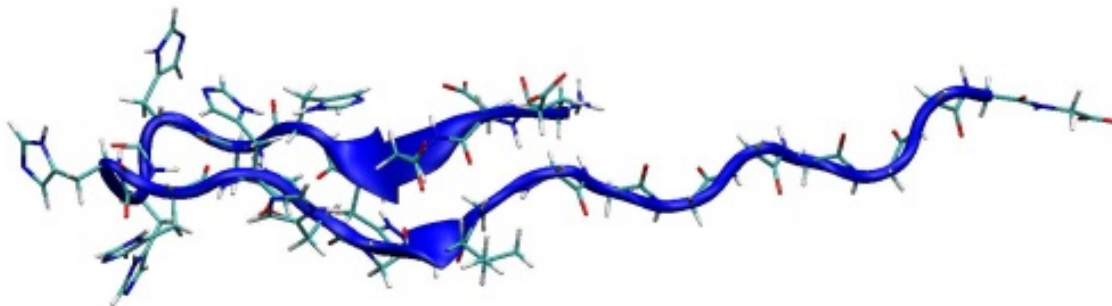

**Fig. S1** Predicted model of folded EDD(H)<sub>9</sub>GV(G)<sub>10</sub>-NH<sub>2</sub> peptide obtained from Phyre 2.

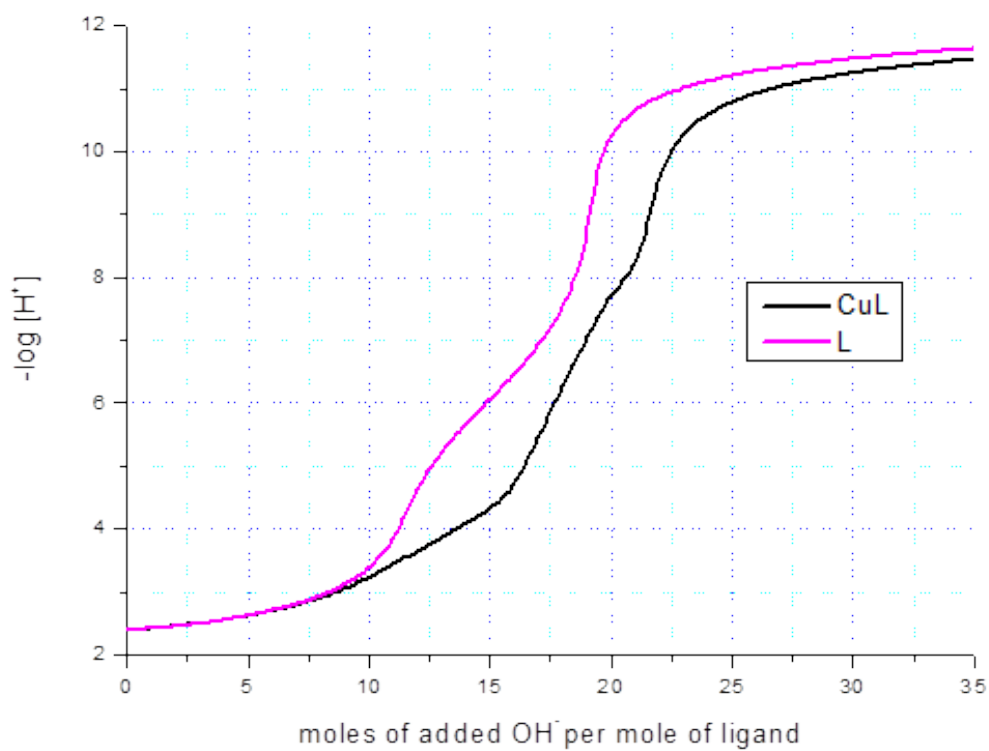

**Fig. S2** Comparison between the experimental titration curve of pHPG in the absence/presence of  $Cu^{2+}$ , at  $25^\circ C$  and  $I = 0.1 M$  (KCl).  $C_M = 4 \cdot 10^{-4} M$ ; M/L molar ratio = 1:1.2.

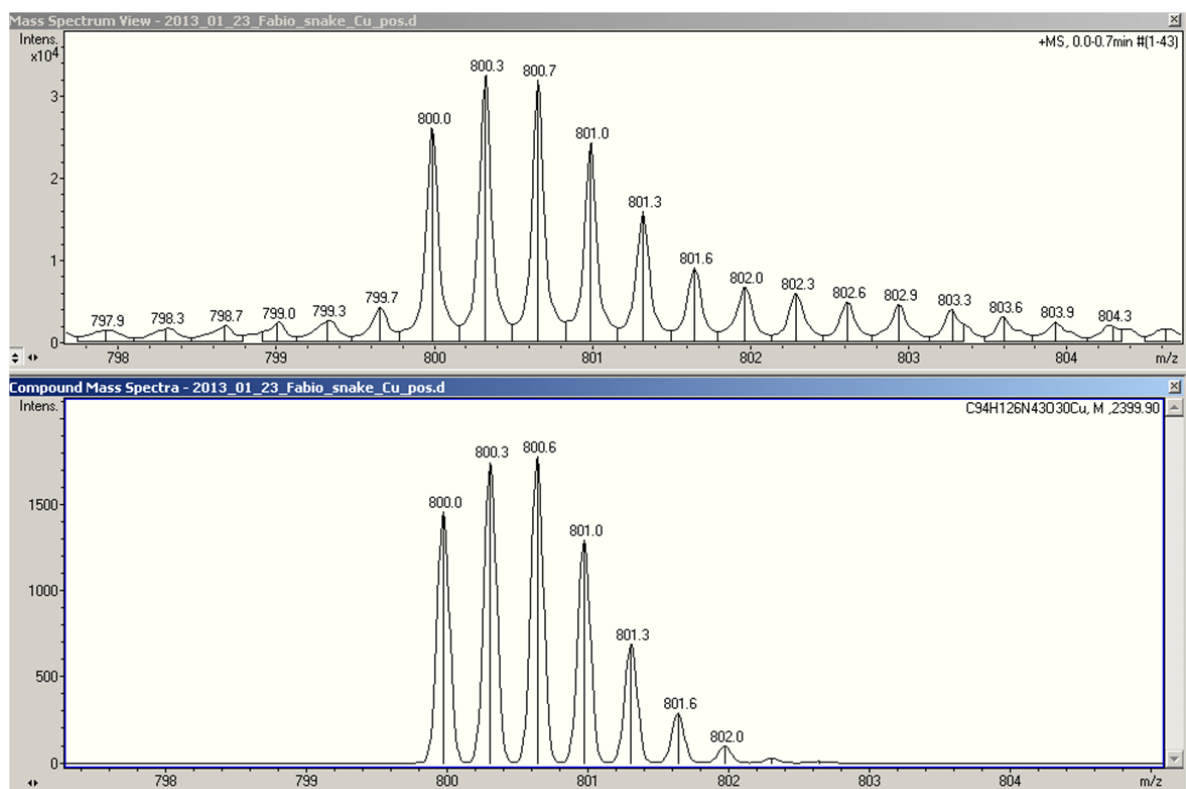

**Fig. S3** Experimental (up) and simulated (down) ESI-MS spectrum for the complex  $[\text{CuH}_4\text{L}]^{3+}$  ( $m/z = 800.3$  D) in the Cu(II)/pHpG system, in aqueous solution, at pH 3.0.

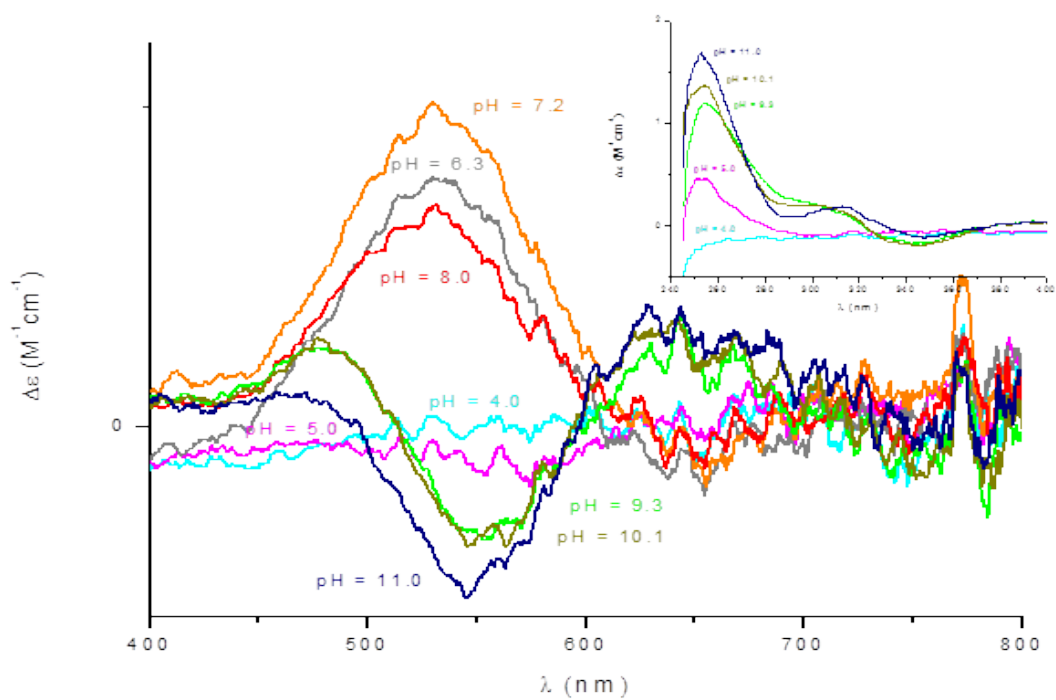

**Fig. S4** CD spectra, at different pH values, for the system Cu(II)/pHpG.  $C_M = 4 \cdot 10^{-4}$  M; M/L molar ratio = 1:1.2.

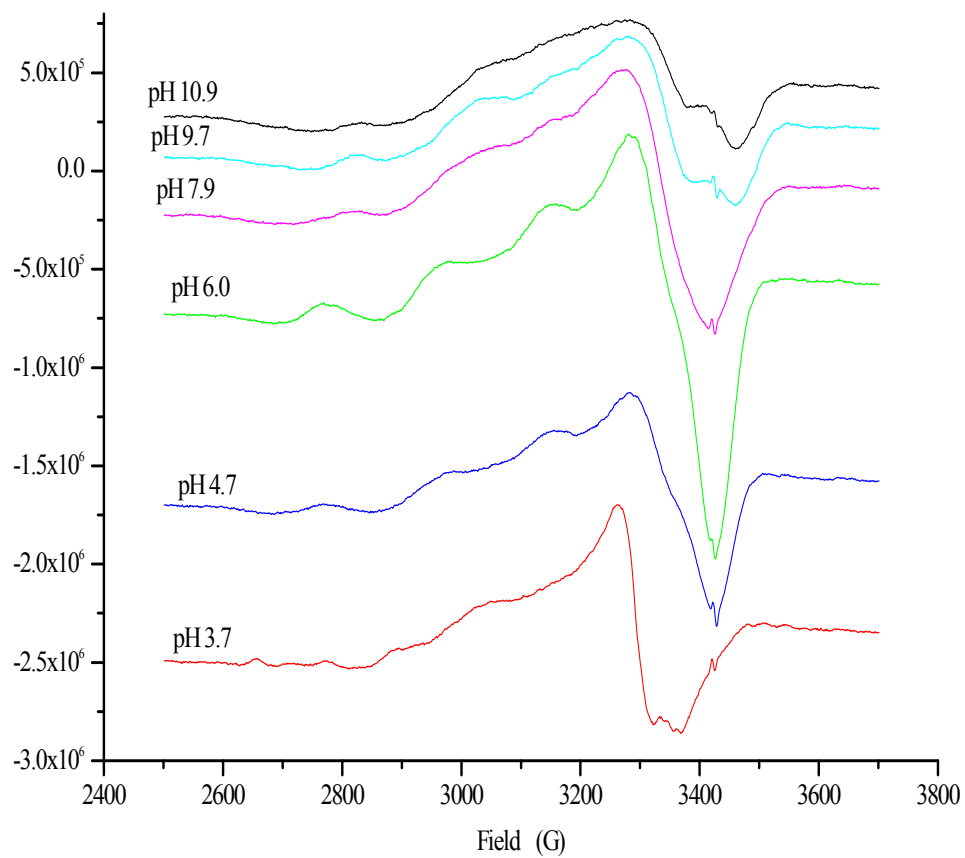

**Fig. S5** EPR spectra, at different pH values, for the system  $\text{Cu(II)/pHpG.C}_M^{\circ} = 1 \cdot 10^{-3} \text{ M}$ ; M/L molar ratio = 1:1.2.

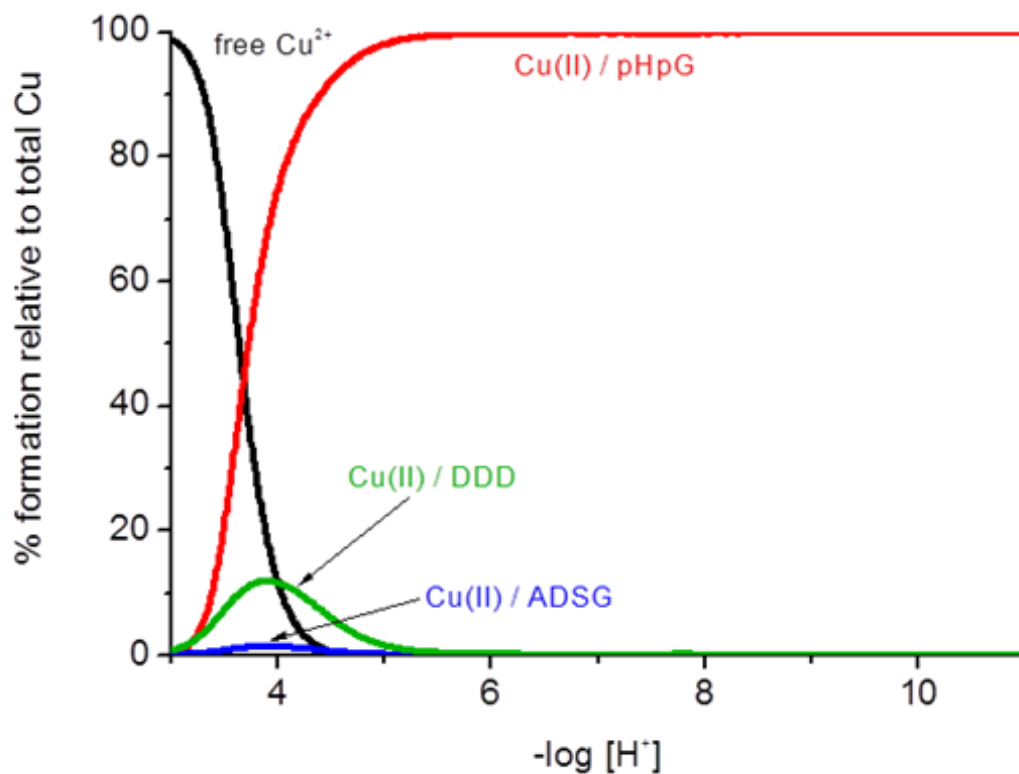

**Fig. S6** Calculated competition diagram for a solution containing Cu(II), pHpG-1 and two peptides having Asp as second residue at their unprotected amino-terminus. The total concentration of each component is  $1 \cdot 10^{-3} \text{ mol} \cdot \text{dm}^{-3}$ . Data from: L. D. Pettit and H. K. J. Powell, The IUPAC Stability Constants Database, Royal Society of Chemistry, London, 1992-2000.

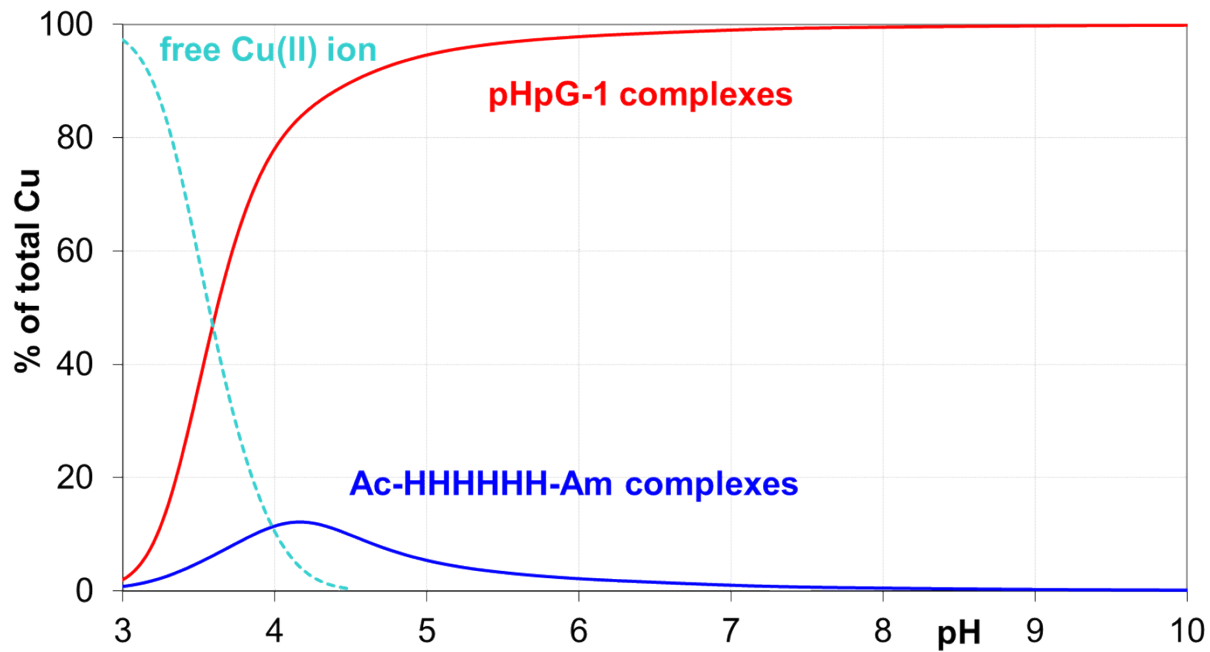

**Fig. S7** Calculated competition diagram for a ternary solution containing the Cu(II), pHpG-1 and the protected peptide Ac-HHHHHH-Am. The total concentration of each component is  $1 \cdot 10^{-3} \text{ mol} \cdot \text{dm}^{-3}$ . The equilibrium constants for the system Cu(II)/Ac-HHHHHH-Am are taken from J. Watly, E. Simonovsky, R. Wieczorek, N. Barbosa, Y. Miller, H. Kozłowski, *Inorg. Chem.* 2014, 53, 6675–6683.



**Table S1** The conformational energies (computed using the GBMV calculations<sup>1,2</sup>) for the ten simulated constructed models for Cu<sup>2+</sup>-EDD(H)<sub>9</sub>GV(G)<sub>10</sub>-Am complex.

| <b>Model</b> | <b>Conformational energy<br/>(kcal/mol)</b> | <b>Standard deviation<br/>(kcal/mol)</b> |
|--------------|---------------------------------------------|------------------------------------------|
| <b>M1</b>    | -1021.74                                    | 0.69                                     |
| <b>M2</b>    | -986.10                                     | 1.25                                     |
| <b>M3</b>    | -1000.61                                    | 1.49                                     |
| <b>M4</b>    | -989.42                                     | 0.76                                     |
| <b>M5</b>    | -981.94                                     | 0.89                                     |
| <b>M6</b>    | -980.53                                     | 3.28                                     |
| <b>M7</b>    | -961.68                                     | 1.08                                     |
| <b>M8</b>    | -988.15                                     | 0.44                                     |
| <b>M9</b>    | -972.20                                     | 2.89                                     |
| <b>M10</b>   | -955.18                                     | 0.97                                     |

Lee, M. S.; Feig, M.; Salsbury, F. R.; Brooks, C. L., *J. Comp. Chem.*, **2003**, 24, 1348.

<sup>2</sup> Lee, M. S.; Salsbury, F. R.; Brooks, C. L., *J. Chem. Phys.*, **2002**, 116, 10606.
